# Supplementary material
Source: PubMed Central journal article supplement (PMC9291638)
Supplement: NIHMS1818053-supplement-Supplementary_material.pdf [file NIHMS1818053-supplement-Supplementary_material.pdf]

## Supplemental Materials

### Repeated *Plasmodium falciparum* infection in humans drives the clonal expansion of an adaptive $\gamma\delta$ T cell repertoire

Anouk von Borstel<sup>1</sup>, Priyanka Chevour<sup>1</sup>, Daniel Arsovski<sup>1</sup>, Jelte M. M. Krol<sup>2,3</sup>, Lauren J. Howson<sup>1,‡</sup>, Andrea A. Berry<sup>4</sup>, Cheryl L. Day<sup>5</sup>, Paul Ogongo<sup>6,7</sup>, Joel D. Ernst<sup>6</sup>, Effie Y. H. Nomicos<sup>8</sup>, Justin A. Boddey<sup>2,3</sup>, Edward Giles<sup>9</sup>, Jamie Rossjohn<sup>1,10,11</sup>, Boubacar Traore<sup>12</sup>, Kirsten E. Lyke<sup>4,#</sup>, Kim C. Williamson<sup>13,#</sup>, Peter D. Crompton<sup>14,#</sup> and Martin S. Davey<sup>1,\*</sup>

#### Affiliations:

<sup>1</sup> Infection and Immunity Program and Department of Biochemistry and Molecular Biology, Biomedicine Discovery Institute, Monash University, Clayton, Victoria 3800, Australia

<sup>2</sup> The Walter and Eliza Hall Institute of Medical Research, Parkville, VIC 3052, Australia

<sup>3</sup> University of Melbourne, Melbourne, VIC 3010, Australia

<sup>4</sup> Vaccine Development and Global Health, University of Maryland School of Medicine, Baltimore, MD, USA

<sup>5</sup> Department of Microbiology and Immunology, Emory Vaccine Center and Yerkes National Primate Research Center, Emory University, Atlanta, Georgia, USA

<sup>6</sup> Division of Experimental Medicine, Department of Medicine, UCSF School of Medicine, San Francisco, California, USA

<sup>7</sup> Department of Tropical and Infectious Diseases, Institute of Primate Research, National Museums of Kenya, P.O Box 24481 - 00502, Nairobi, Kenya

<sup>8</sup> Parasitology and International Programs Branch, Division of Microbiology and Infectious Diseases, NIAID, NIH, Bethesda, MD, USA

<sup>9</sup> Department of Paediatrics, Monash University, and Centre for Innate Immunity and Infectious Disease, Hudson Institute of Medicine, Clayton, Victoria 3168, Australia

<sup>10</sup> Australian Research Council Centre of Excellence in Advanced Molecular Imaging, Monash University, Clayton, Victoria 3800, Australia

<sup>11</sup> Institute of Infection and Immunity, Cardiff University School of Medicine, Heath Park, CF14 4XN Cardiff, United Kingdom

<sup>12</sup> Malaria Research and Training Center, Department of Epidemiology of Parasitic Diseases, International Center of Excellence in Research, University of Sciences, Techniques and Technologies of Bamako, Bamako, Mali

<sup>13</sup> Department of Microbiology and Immunology, Uniformed Services University of the Health Sciences, Bethesda, MD, USA

<sup>14</sup> Malaria Infection Biology and Immunity Section, Laboratory of Immunogenetics, National Institute of Allergy and Infectious Disease, National Institute of Health, Rockville, MD, USA

‡ Present address: Immunology Division, Walter and Eliza Hall Institute of Medical Research, Parkville, VIC, Australia

# Contributed equally

\*To whom correspondence should be addressed: martin.davey@monash.edu

## Supplemental Materials and Methods

### Study populations

#### Malian cohort

We studied peripheral blood mononuclear cells (PBMCs) from a cohort of 23 children (aged 4 – 17 years, 14 females) and five adults (aged 21 – 26, 4 females) who were enrolled in a longitudinal study conducted in a malaria-endemic region of Mali that involved both passive and active surveillance for febrile malaria episodes (**Table S1**). We followed nine of these children (aged 8 – 14, five females) longitudinally for up to 32 months (**Fig. 1G**). A detailed description of this cohort study has been published elsewhere (*1*). Venous blood samples were collected at cross-sectional timepoints from all subjects before (April/May) and after (December/January) each malaria season, and during the first febrile malaria episode of each season when it occurred. The research definition of febrile malaria was  $\geq 2,500$  asexual *P. falciparum* parasites/ $\mu\text{L}$ , an axillary temperature of  $\geq 37.5^\circ\text{C}$  within 24 hours, and no other cause of fever discernible by physical exam. However, all febrile malaria episodes, irrespective of parasite density, were treated with artemether-lumefantrine according to the Mali National Malaria Control Program guidelines. Subjects were selected for the longitudinal study if they experienced at least two febrile malaria episodes over different seasons and had cryopreserved PBMCs available for analysis. All nine subjects experienced febrile malaria during the first wet season but not all subjects experienced febrile malaria during the second or third wet seasons (**Fig. 1G**). The Ethics Committee of the Faculty of Medicine, Pharmacy and Dentistry at the University of Sciences, Techniques and Technology of Bamako, and the Institutional Review Board of NIAID NIH approved this study (ClinicalTrials.gov, NCT01322581). Written informed consent was obtained from the parents or guardians of participating children and from adult participants.

### **Australian cohort**

Blood was obtained from a cohort of nineteen healthy Australian children (aged 1 – 17 years, 12 females) who were undergoing endoscopy procedures at Monash Children's Hospital, Melbourne. These subjects were being screened for coeliac disease or inflammatory bowel disease, but all subjects included in this study were negative for both conditions (**Table S1**). Written informed consent was obtained from the parents or guardians of participating children and this study was approved by Monash Health research ethics committee (HREC/16/MonH/253).

### **Australian and Kenyan adults**

PBMCs were obtained from the buffy packs of fourteen Australian adults (aged 20 - 71, 6 females), procured from the Australian Red Cross (ARC) Lifeblood, Melbourne, and all donors gave written informed consent (**Table S1**). These samples were approved for use in this study by the Australian Red Cross ethics committee and MUHREC (19488, 14487). We also studied blood samples from six adults (aged 26 – 49, 3 females) from Kenya (**Table S1**). The Kenyan adults tested negative for malaria (rapid diagnostic test, RDT) and tuberculosis (interferon  $\gamma$  release assay) and gave written informed consent. The study was approved by the Kenya Medical Research Institute, Scientific and Ethics Review Unit.

### **Controlled human malaria infection (CHMI) cohort**

We studied five CHMI subjects (aged 23 – 44, 5 males) from the greater Baltimore area (Baltimore, MD, U.S.) from whom either leukocytes or venous blood were collected at baseline

(60 days before infection) by apheresis, immediately prior to infection (CHMI + 1d) by venipuncture and 21 days (d) after the first infection (CHMI + 21d) by apheresis. Where apheresis was used to obtain leukocytes and plasma, a clinical assessment of each individual was conducted prior to collection, including assessment of lymphopenia. All subjects passed this assessment and proceeded to plasma and leukocyte collection by apheresis. Subjects were infected by the bites of five *Anopheles stephensi* mosquitos carrying *P. falciparum* (strain NF54; kindly provided by Sanaria). All subjects were then evaluated as part of an inpatient stay to diagnose *P. falciparum* malaria infection and to be treated with Malarone® (Atovaquone/proguanil) and Coartem® (artemether/lumefantrine) as secondary treatment. Daily observations were undertaken from study day 6 until malaria diagnosis based upon the detection of two unquestionable parasites by blood smears. Malaria cure was confirmed by treatment for all subjects after three days of directly observed therapy and two negative blood smears separated by a time interval >12 hours, followed by a third negative smear >12 hours after the previous two daily smears. This procedure was then repeated in each subject on three further occasions. All subjects gave written informed consent and the study was approved by the medical ethics committee of the University of Maryland, Baltimore (Clinical trial NCT03014258).

### **Peripheral blood mononuclear cell isolation**

In the Kenya, Australian and CHMI study cohorts, heparinised venous blood, total leukocytes obtained by apheresis or from buffy packs obtained from the Australian Red Cross Lifeblood, were used to isolate PBMCs. In short, peripheral blood or leukocytes were layered over lymphoprep (Stemcell Technologies) and gradient centrifuged for 20 mins at 600 x g at room

temperature (RT) without brake. The resulting PBMC layer was washed twice in Roswell memorial park institute (RPMI)-1640 medium for 10 mins at 400 x g at 4°C. PBMCs were frozen in fetal calf serum (FBS; Sigma Aldrich or Gibco) and 10% dimethyl sulfoxide (Sigma Aldrich) at -80°C for 24 hours and stored until use in liquid nitrogen.

In the Mali study, blood samples drawn by venipuncture were collected in sodium citrate-containing cell preparation tubes (Vacutainer CPT Tubes, BD) and transported to the laboratory in Bamako where PBMCs and plasma were separated by centrifugation. PBMCs were isolated from the Vacutainer CPT Tubes according to manufacturer instructions and were frozen within 3 h of the blood draw in FBS containing 7.5% DMSO (FBS: Gibco; DMSO: Sigma-Aldrich). The cells were first frozen at -80°C for 24 h and subsequently transferred to liquid nitrogen for long-term storage.

### **Antibodies and flow cytometry**

Frozen PBMCs were thawed and washed twice in PBS. For the detection of surface marker expression, cells were stained with Zombie Aqua fixable viability dye (1:500, BioLegend). PBMCs were then stained in FACS buffer (PBS, 2% FBS and 0.04% sodium azide) with antibodies indicated in the cell surface panel (**Table S3**). To quantify absolute cell numbers, accucheck counting beads (ThermoFisher Scientific) were added to a selection of samples. To detect intracellular cytotoxic molecules PBMCs were fixed and permeabilized using the Foxp3/Transcription factor staining buffer set (eBioscience). Fixed/permeabilized PBMCs were then resuspended in permeabilization buffer containing intracellular antibodies (**Table S3**). A representative gating strategy is shown in **Fig. S2**. All samples were acquired on the Fortessa

X20 (BD Biosciences) flow cytometer and FCS files were analysed using FlowJo v10 (BD Biosciences/Treestar).

### **Bulk cell sorting and RNA-based TCR repertoire analysis**

Frozen PBMCs were thawed and stained with Zombie Aqua dye and then incubated with antibodies indicated in the bulk sort panel (**Table S3**) for 20 mins on ice. Cells were then bulk sorted into *RNAlater* (Sigma Aldrich) using the sort strategy described in **Fig. S2** using a FACS ARIA II Fusion (BD Biosciences). Resultant cell numbers sorted for each population is given in **Table S4**. RNA was purified using a RNeasy plus micro kit (Qiagen) following the manufacturers' instructions. The human TCR $\delta$  and  $\gamma$  chain iR profile kits (iRepertoire Inc) were used to perform amplicon rescued multiplex (ARM)-PCR to generate complementarity determining region (CDR) 3 libraries for sequencing following the manufacturer's instructions. Sequencing was performed using an Illumina MiSeq (Micromon and Monash Health Translation Precinct Medical Genomics Facility). From raw sequencing data (<https://osf.io/7rdm9/> and <https://osf.io/3qvmh/>) we used iRweb tools (iRepertoire Inc) to assign CDR3 sequences, variable (V), diversity (D), and junction (J) gene usage, calculate diversity indexes (DI; this metric considers the clonal frequency to occupy 50% of the total repertoire (D50) and abundance of unique CDR3 sequences (Shannon entropy)) and plot tree maps.

### **Single cell sorting and complementarity determining region 3 TCR sequencing**

Frozen PBMCs were thawed and stained with Zombie Aqua dye and then incubated with antibodies indicated in the single cell sort panel (**Table S3**). Single cells were then sorted into 96 wells plates (Axygen) containing 2  $\mu$ l Superscript VILO cDNA synthesis kit reaction mix

(ThermoFisher) containing 0.1% Triton X-100 (ThermoFisher) and incubated according to the manufacturers' instructions. TCR $\gamma$  and TCR $\delta$  cDNAs were amplified by two rounds of nested PCR using GoTaq mastermix (Promega), using external primers for V $\delta$ 1 - CAAGCCCAGTCATCAGTATCC, C $\delta$  - GCAGGATCAAACCTCTGTTATCTTC, V $\gamma$ 1-8 - CTGGTACCTACACCAGGAGGGGAAGG, V $\gamma$ 9 - AGAGAGACCTGGTGAAGTCATACA, and C $\gamma$  - CTGACGATACATCTGTGTTCTTTG, and internal primers for V $\delta$ 1 - CAACTTCCCAGCAAAGAGATG and C $\delta$  - TCCTTCACCAGACAAGCGAC, or V $\gamma$ 1-8 - TGTGTTGGAATCAGGAVTCAG, V $\gamma$ 9 - GGTGGATAGGATACCTGAAACG, and C $\gamma$  - AATCGTGTGCTCTTCTTTTCTT. PCR products were visualized using the QIAxcel DNA fast analysis kit (Qiagen). products of successful reactions were incubated with ExoSAP-IT PCR cleanup enzyme (Affymetrix) before sequencing with BigDye Terminator v3.1 (Applied Biosystems) following manufacturer's instructions and running on an ABI 3730 capillary sequencer (Micromon, Monash University). Resulting complementarity determining regions 3 (CDR3) nucleotide sequences were identified using the IMGT Junction analysis tool (75)

### **Parasite culture and purification**

*P. falciparum* NF54 asexual blood stages were cultured in RPMI 1640 supplemented with 26mM HEPES, 50 $\mu$ g/mL hypoxanthine, 20 $\mu$ g/mL gentamicin, 2.9% NaHCO<sub>3</sub>, 5% Albumax II and 5% heat-inactivated human serum (Australian Red Cross). Parasites were maintained with human type O-positive RBCs at 4% haematocrit (Australian Red Cross) in a gaseous mix of 5% CO<sub>2</sub>, 1% O<sub>2</sub> in N<sub>2</sub> at 37°C. Synchronous late trophozoite and early schizont parasites (32-40 hr old) were grown to 5% parasitemia before purification. Briefly, cultures were centrifuged at 2000 g for 5 min and passed over a MACS column under magnetic force (Miltenyi). Mature parasites

retained within the magnet were washed and eluted in the absence of magnetic force with RPMI complete medium before pelleting at 2000 g for 5 min. Medium was aspirated and purified infected erythrocytes were used in subsequent experiments. Uninfected erythrocytes were from the same sources of human type O-positive RBCs.

### **PBMC culture and activation**

For proliferation of  $\gamma\delta$  T cells, PBMCs were labelled with cell trace violet (ThermoFisher) and cultured with *P. falciparum* infected RBCs (iRBCs), their extracts (PFTSE) or uninfected RBCs (uRBC) or uRBC extracts (uRBCE) for up to 6 days with 20 U/ml IL-2 (Miltenyi) in RPMI-1640 medium (Invitrogen) supplemented with 2 mM L-glutamine, 1% sodium pyruvate, 50  $\mu$ g/ml penicillin/streptomycin (Invitrogen) and 10% fetal calf serum (Sigma). Cultured cells were then stained with Zombie UV fixable viability dye (BioLegend) and then stained with the proliferation panel antibodies (**Table S3**).

### **Statistical analysis**

Tabulated data were analyzed in Graphpad PRISM 9 (Graphpad Software, Inc.). Each data set was assessed for normality using Shapiro–Wilk normality test. Differences between cohorts were analyzed by two-tailed Student’s t-tests for normally distributed data, Mann–Whitney for non-parametric data and Wilcoxon signed-rank test for paired data. Differences between groups were analyzed using one-way ANOVA with Dunnett’s or Tukey’s post tests for normally distributed data or with Kruskal–Wallis test with Tukey’s post tests for non-parametric data and RM two-way ANOVA with Tukey’s post-hoc test was used when comparing groups with independent variables. Differences between repeated measures and correlations were analyzed via linear



mixed effects modelling using the PROC MIXED procedure in SAS software version 9.4 (SAS Institute, Cary, NC, USA). Post-hoc comparisons were performed using Bonferroni method for multiple comparisons. \*P < 0.05, \*\*P < 0.01, \*\*\*P < 0.001 and \*\*\*\*P < 0.0001.

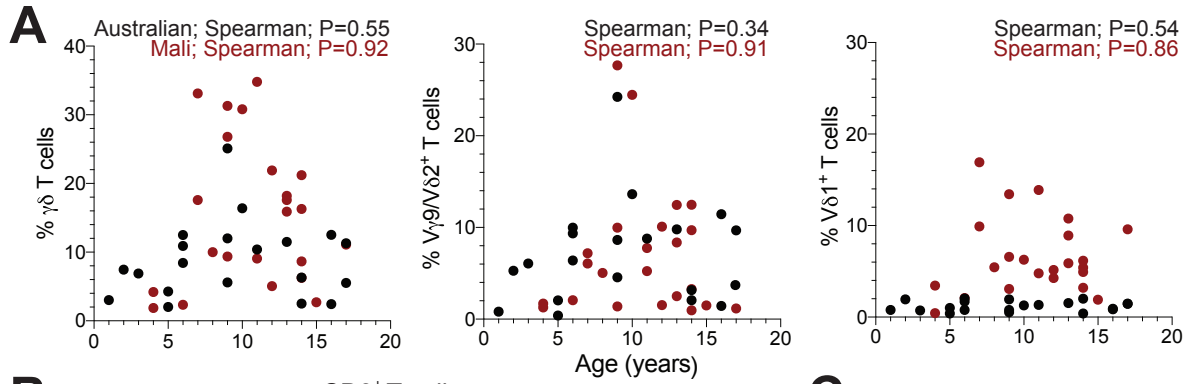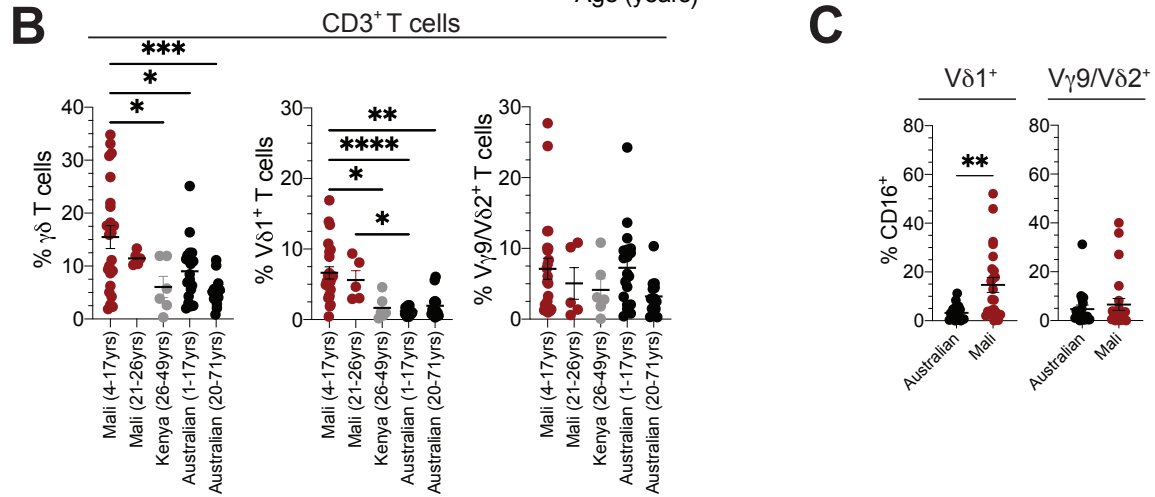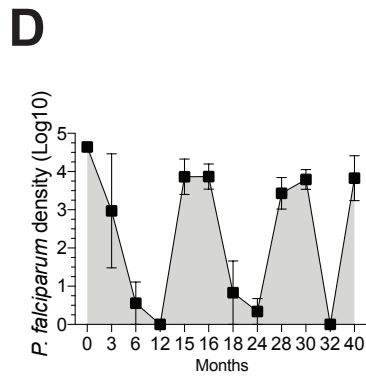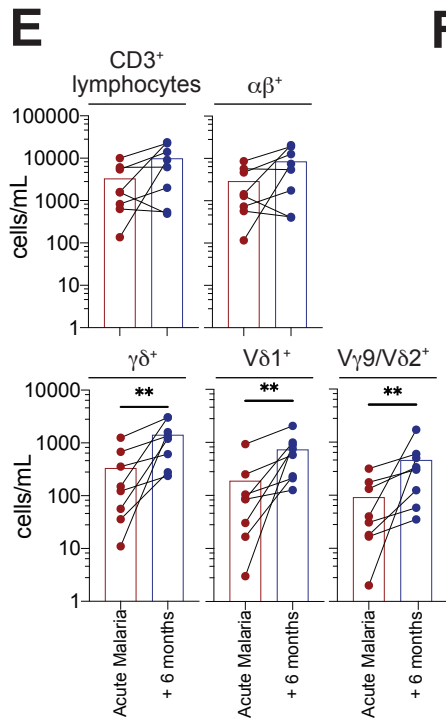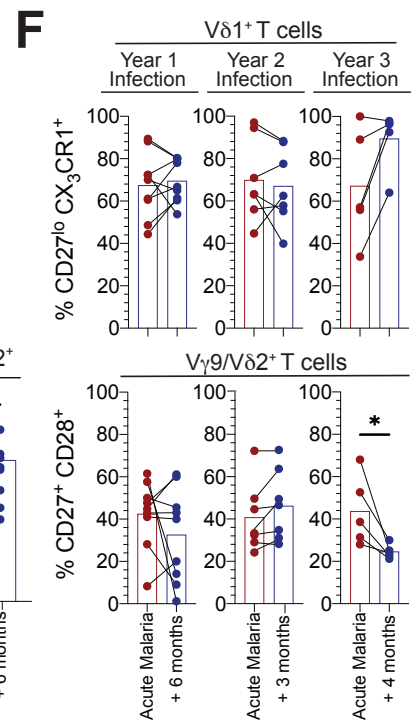

**Figure S1. T cell frequencies in Malian subjects exposed to *P. falciparum* infection. A.** Frequencies of total  $\gamma\delta$ ,  $V\gamma9/V\delta2^+$  and  $V\delta1^+$ T cells within  $CD3^+$  T cells versus age. **B.** Frequencies of total  $\gamma\delta$ ,  $V\gamma9/V\delta2^+$  and  $V\delta1^+$ T cells within  $CD3^+$  T cells in children and adults from Mali, Kenya and Australia (details in **Table S1**). **C.** *P. falciparum* density in Malian subjects over 40 months (n=5). **D.** Frequencies of  $CD16^+$  cells within  $V\delta1^+$  or  $V\gamma9/V\delta2^+$  T cells in Australian (n=20) or Malian (n=23) children. **E.** Absolute cell counts of  $CD3^+$  lymphocytes,  $\alpha\beta^+$ ,  $\gamma\delta^+$ ,  $V\gamma9/V\delta2^+$  and  $V\delta1^+$  T cells (n=8; from a subset of subjects in year 1). **F.** Frequencies of  $CD27^{lo} CX_3CR1^+$  cells in  $V\delta1^+$  or  $CD27^+ CD28^+$  cells in  $V\delta2^+$  T cells over three years of seasonal malaria transmission and episodes of acute malaria. Normality was tested using the Shapiro-Wilk test. Error bars indicate means  $\pm$  SEM and bars indicate mean; \*P < 0.05; \*\*P < 0.01; \*\*\*P < 0.001; \*\*\*\*P < 0.0001; p-values were determined by Spearman correlation (**a**), Kruskal-Wallis test with Dunn's post hoc testing (**b**) and Mann-Whitney test (**d, e, f**).

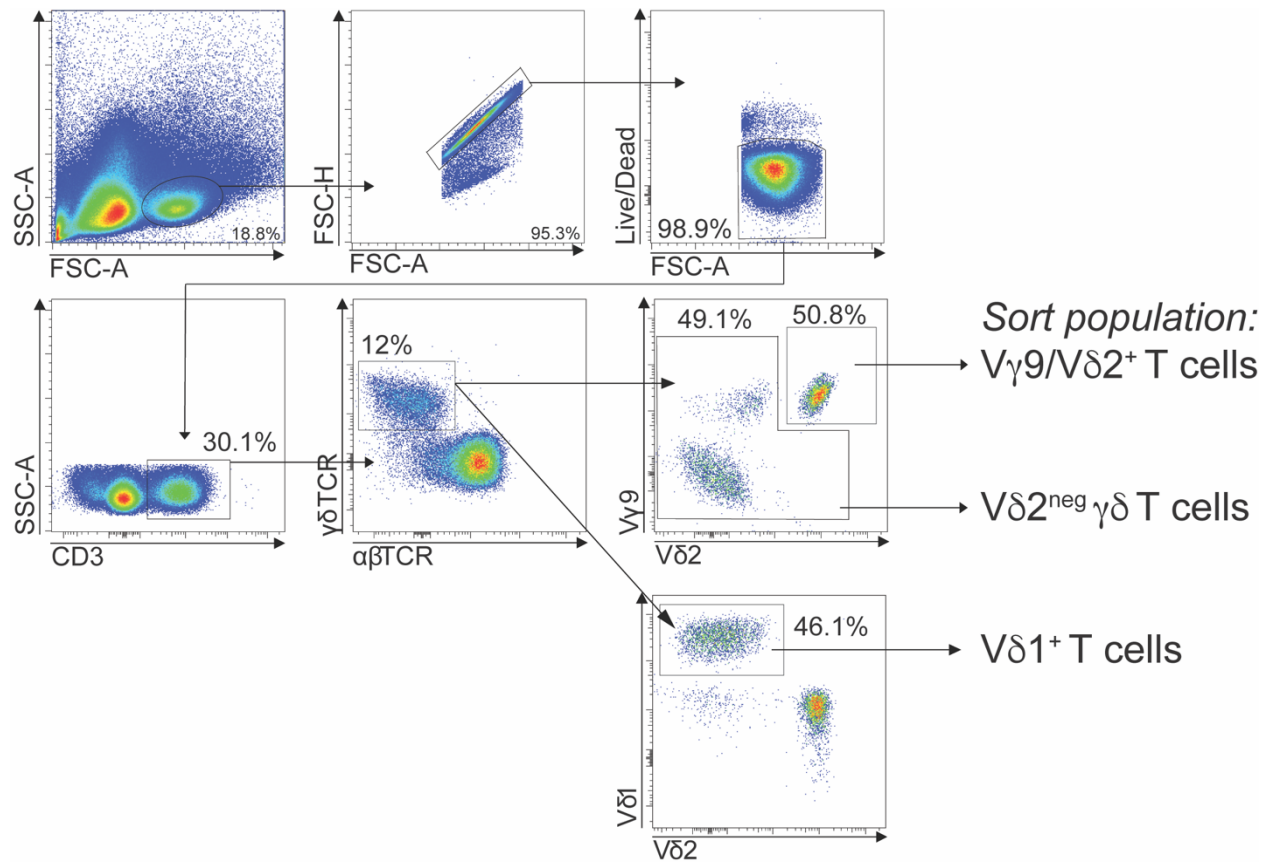

**Figure S2. The gating strategy used to sort  $\gamma\delta$  T cells.** The gating strategy used to identify and sort  $\gamma\delta$  T cell subsets shown in a representative donor. Lymphocytes were gated using the FSC-A/SSC-A, doublets were excluded using FSC-A/FSC-H, viable cells gated in the FSC-A/Live/Dead and then viable CD3<sup>+</sup> T cells identified using the CD3/SSC-A plot. To sort  $\gamma\delta$  T cell populations, viable CD3<sup>+</sup> T cells were gated for total  $\gamma\delta$  T cells using an  $\alpha\beta$ TCR/ $\gamma\delta$ TCR plot and then within the  $\gamma\delta$  T cell population, we gated on V $\delta$ 1<sup>+</sup> T cells using V $\delta$ 2/V $\delta$ 1 and V $\delta$ 2<sup>+</sup> or V $\delta$ 2<sup>neg</sup> T cells identified using a V $\delta$ 2/V $\gamma$ 9 plot (antibody panels are detailed in **Table S3**).

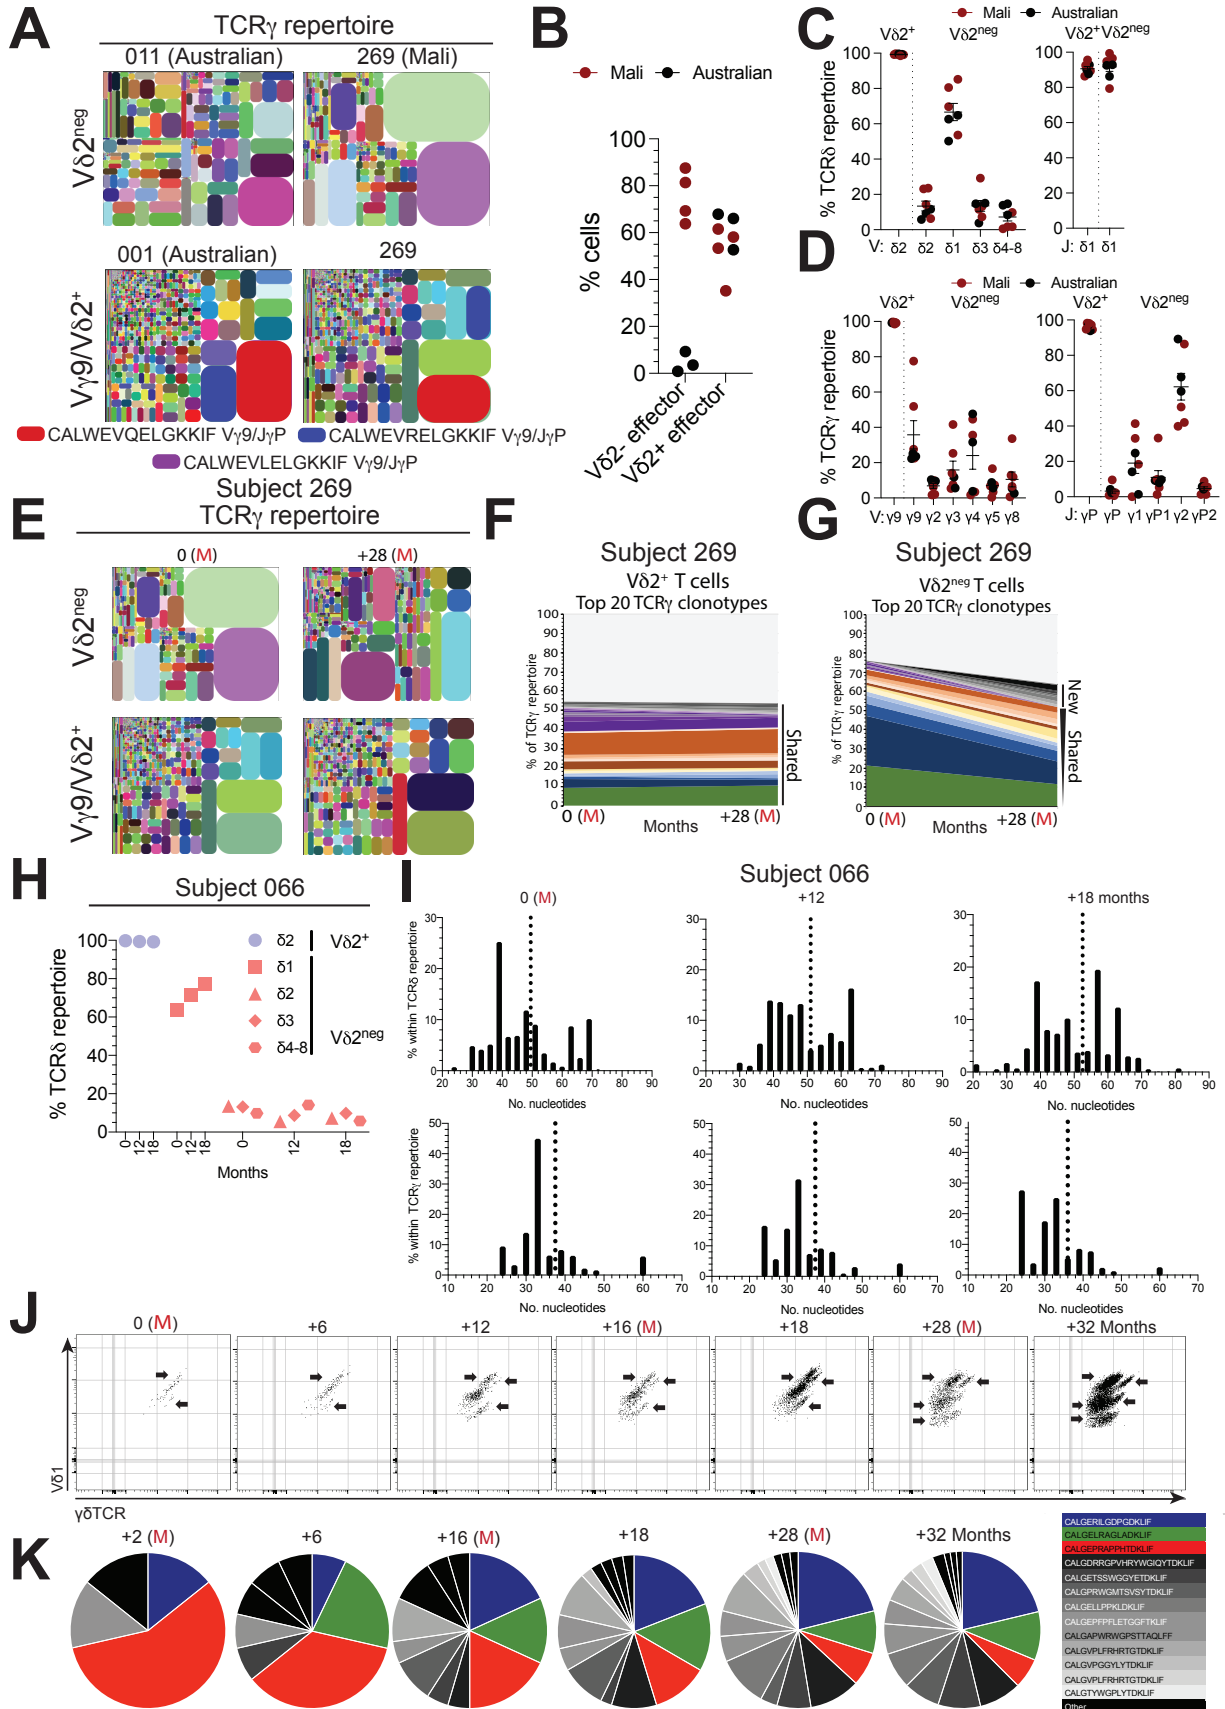

**Figure S3. Longitudinal  $\gamma\delta$ TCR analysis in Malian subjects.** **A.** TCR $\gamma$  clonotype tree plot analysis of V $\delta$ 2<sup>neg</sup> and V $\delta$ 2<sup>+</sup> T cell populations from Australian and Malian children. **B.** Frequency of CD27<sup>lo</sup> CX<sub>3</sub>CR1<sup>+</sup> effector cells in V $\delta$ 2<sup>neg</sup> (V $\delta$ 2<sup>-</sup> effector) or CD27<sup>+</sup> CD28<sup>+</sup> effector cells in V $\delta$ 2<sup>+</sup> T cells (V $\delta$ 2<sup>+</sup> effector) from Australian subject (1, 5, 10 and 11) and Malian subjects (066, 521, 766 and 269). **C.** V $\delta$  and J $\delta$  usage and **D.** V $\gamma$  and J $\gamma$  usage in V $\delta$ 2<sup>neg</sup> and V $\delta$ 2<sup>+</sup> T cells from Malian (red dots; n=4) and Australian (black dots; n=3) subjects. **E.** Tree plots of TCR $\gamma$  repertoires and clonotype analysis from **F.** V $\delta$ 2<sup>+</sup> and **G.** V $\delta$ 2<sup>neg</sup> T cells at 0 or 28 months, from subject 269. **H.** Longitudinal V $\delta$  chain usage in V $\delta$ 2<sup>+</sup> and V $\delta$ 2<sup>neg</sup> T cell repertoires after acute febrile malaria in Malian subject 066. **I.** Non-normalised CDR3 amino acid sequence length in TCR $\delta$  and TCR $\gamma$  repertoires over time in Malian subject 066. **J.** Flow cytometry plots of  $\gamma\delta$ TCR vs V $\delta$ 1 antibody staining in total V $\delta$ 1<sup>+</sup>  $\gamma\delta$  T cells from subject 179. Each flow cytometry plot represents a different timepoint, acute febrile malaria indicated by (M) and arrows indicate distinct populations. **K.** TCR $\delta$  single cell sequencing pie charts from CD27<sup>lo</sup>CX<sub>3</sub>CR1<sup>+</sup> V $\delta$ 1<sup>+</sup> T cells at each timepoint from subject 179.

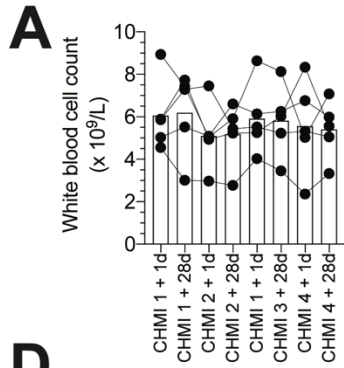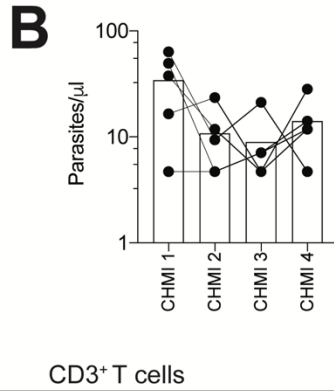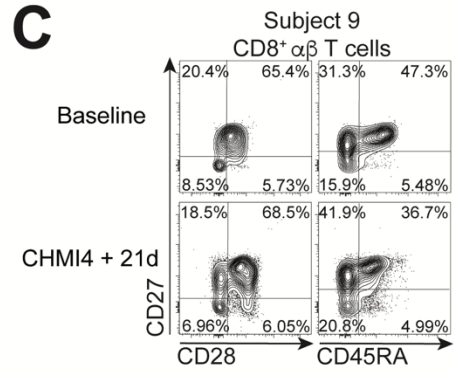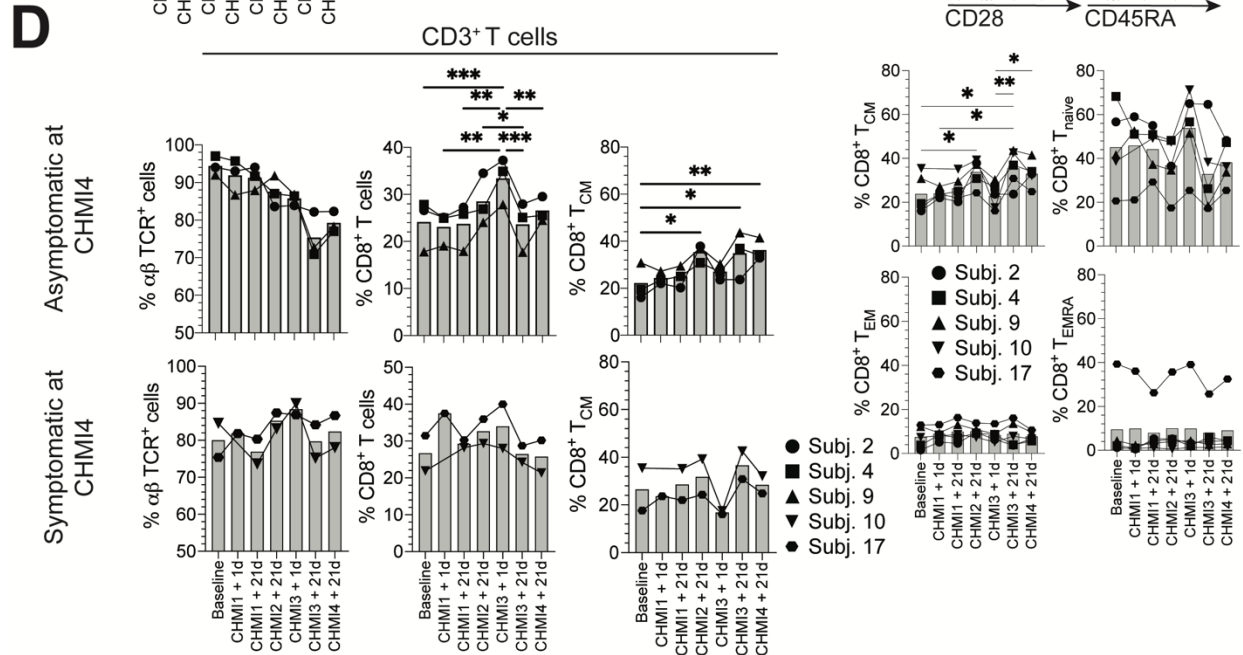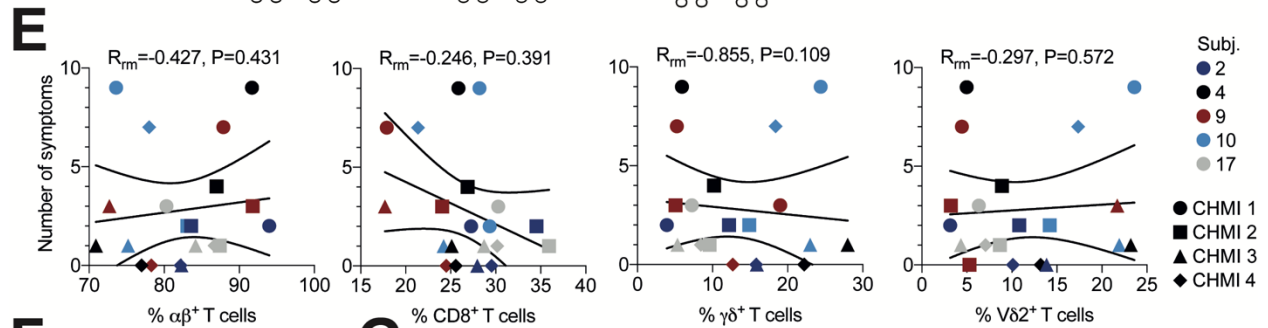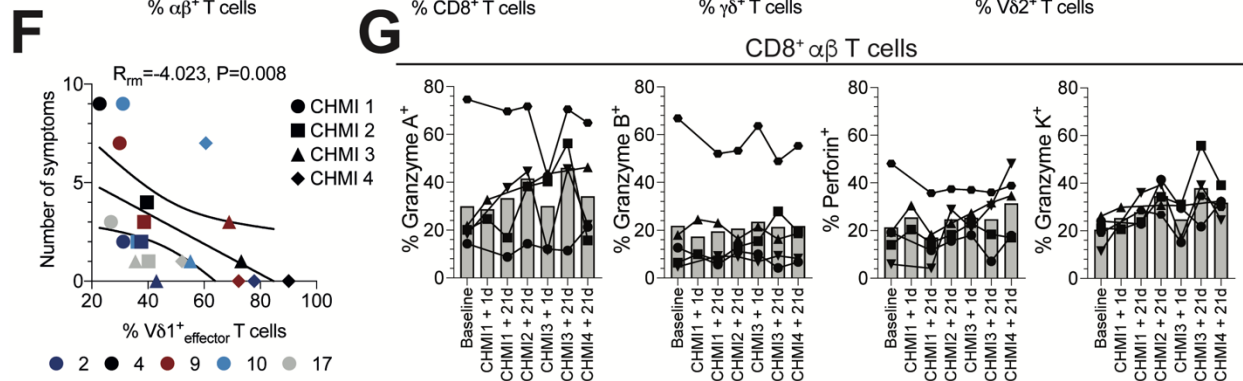

**Figure S4. T cell frequencies in Malian subjects exposed to *P. falciparum* infection.** **A.** White blood cell counts (WBC) taken 1 day before or 28 days after each CHMI (n=5). **B.** During each CHMI, the peak parasite density measured by blood smear (n=5). **C.** Representative flow cytometry plots show memory population of CD8<sup>+</sup> T cells and graphs show frequencies of CD8<sup>+</sup> naive (T<sub>naive</sub>), central memory (T<sub>CM</sub>), effector memory (T<sub>EM</sub>) and effector memory CD45RA-revertants (T<sub>EMRA</sub>) across repeated CHMIs (n=5). **D.** Frequencies of total  $\alpha\beta^+$ ,  $\alpha\beta^+$  CD8<sup>+</sup> and  $\alpha\beta^+$  CD8<sup>+</sup> T<sub>CM</sub> cells within total CD3<sup>+</sup> T cells, separated into individuals that were asymptomatic or symptomatic after CHMI4. Repeated measures correlation between **E.** total  $\alpha\beta^+$ ,  $\alpha\beta^+$  CD8<sup>+</sup>, V $\gamma$ 9/V $\delta$ 2<sup>+</sup> T cells within CD3<sup>+</sup> T cells or **F.** V $\delta$ 1<sup>+</sup> T<sub>effector</sub> frequencies within total V $\delta$ 1<sup>+</sup> T cells, and the number of symptoms each individual suffered at each CHMI. **G.** Frequencies of Gzma<sup>+</sup>, B<sup>+</sup>, K<sup>+</sup> and perforin<sup>+</sup> cells within total  $\alpha\beta^+$  CD8<sup>+</sup> T cells before and after repeated CHMIs (n=5). Error bars indicate means  $\pm$  SEM and bars indicate mean. \*P < 0.05; \*\*P < 0.01; \*\*\*P < 0.001; p-values were determined by linear mixed effects modelling with Bonferroni's correction (**a, b, c, d, g**) and repeated measures correlation (**e, f**).



**A**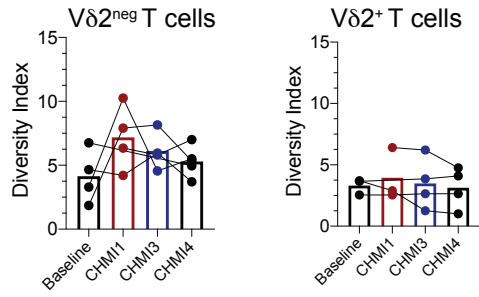**B**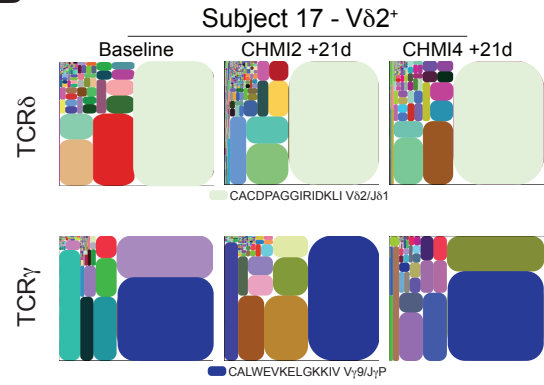**C**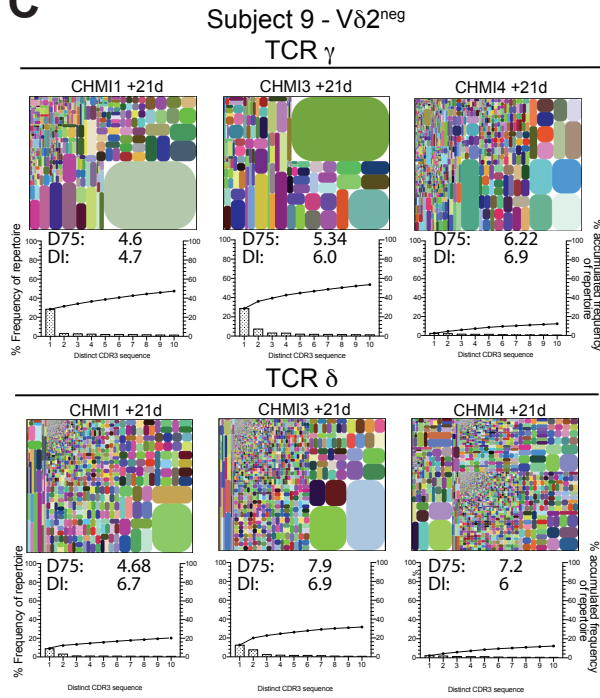**D**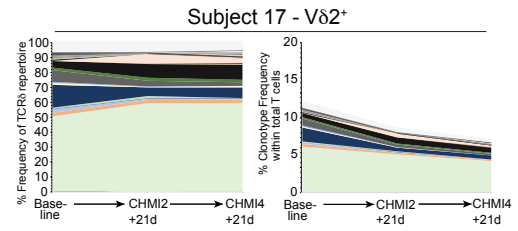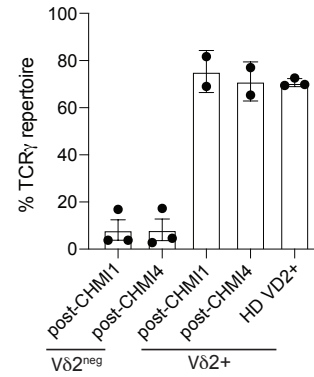

**Figure S5. Longitudinal  $\gamma\delta$ TCR analysis in CHMI subjects.** **A.** Diversity index (DI) in  $V\delta^{neg}$  and  $V\delta^{+}$   $\gamma\delta$  T cell repertoires across CHMIs (n=3-5). **B.** Tree plot and tracking of the top 20 clonotypes in  $V\gamma9/V\delta^{+}$  TCR $\gamma$  repertoires over repeated CHMIs from subject 17. **C.** Tree plot analysis and top 10 clonotype frequency after repeated CHMI from Subject 9. **D.** Sharing of sequences between independent CHMI study subjects, in  $V\delta^{neg}$  (subjects 2, 4 and 9) and  $V\delta^{+}$  T cell repertoires (subjects 4 and 9). For  $V\delta^{+}$  T cell repertoires three healthy UK donor repertoires from Davey *et al* (24) were used to compare the shared sequence frequency. Error bars indicate means  $\pm$  SEM and bars indicate mean.

**Table S1. Study cohort.**

|                              | <b>Mali -<br/>Children</b> | <b>Australian<br/>- Children</b> | <b>Mali -<br/>Adults</b> | <b>Kenya -<br/>Adults</b> | <b>Australian<br/>- Adults</b> |
|------------------------------|----------------------------|----------------------------------|--------------------------|---------------------------|--------------------------------|
| N                            | 23                         | 20                               | 5                        | 6                         | 14                             |
| Age in years, median (range) | 10 (4-17)                  | 9 (1-17)                         | 22 (21-26)               | 29 (26-49)                | 44 (20-71)                     |
| Gender, no. females          | 14                         | 12                               | 4                        | 3                         | 6                              |

**Table S2. Symptoms recorded for each CHMI.**

| Subject                      | CHMI 1 |    |    |    |    | CHMI 2 |    |   |    |    | CHMI 3 |    |    |    |    | CHMI 4 |   |    |    |    |
|------------------------------|--------|----|----|----|----|--------|----|---|----|----|--------|----|----|----|----|--------|---|----|----|----|
|                              | 2      | 4  | 9  | 10 | 17 | 2      | 4  | 9 | 10 | 17 | 2      | 4  | 9  | 10 | 17 | 2      | 4 | 9  | 10 | 17 |
| Total symptoms               | 2      | 9  | 7  | 9  | 3  | 2      | 4  | 3 | 2  | 1  | 0      | 1  | 3  | 1  | 1  | 0      | 0 | 0  | 7  | 1  |
| Total number times           | 3      | 25 | 12 | 22 | 5  | 2      | 15 | 6 | 5  | 1  | 0      | 2  | 7  | 3  | 2  | 0      | 0 | 0  | 14 | 2  |
| Day of onset                 | 12     | 9  | 11 | 8  | 12 | 14     | 7  | 9 | 7  | 12 | 12     | 12 | 13 | 12 |    |        |   | 13 | 8  |    |
| Total subjects with symptoms | 5      |    |    |    |    | 5      |    |   |    |    | 4      |    |    |    |    | 2      |   |    |    |    |
| Fever (Temp)                 | 39     |    |    |    |    | 39     |    |   |    |    | 38     |    |    |    |    |        |   |    |    |    |

Symptoms identified included: Abdominal Pain, Joint Pain, Chills, Dizziness, Headache, Malaise, Myalgia, Nausea, Vomiting.

**Table S3. Flow cytometry antibodies.**

| <b>Panel</b>           | <b>Surface/intracellular staining</b> | <b>Target (anti-human)</b> | <b>Fluorochrome</b> | <b>Provider</b> | <b>Cat. No.</b> |
|------------------------|---------------------------------------|----------------------------|---------------------|-----------------|-----------------|
| Surface Panel          | Surface                               | CD3                        | BUV395              | BD Biosciences  | 563546          |
|                        |                                       | CD8                        | BV786               | BD Biosciences  | 563823          |
|                        |                                       | CD16                       | AF700               | BioLegend       | 302026          |
|                        |                                       | CD27                       | PE-Dazzle594        | BioLegend       | 356422          |
|                        |                                       | CD28                       | PE                  | BioLegend       | 302908          |
|                        |                                       | CD38                       | BV605               | BioLegend       | 303532          |
|                        |                                       | $\alpha\beta$ TCR          | Vioblue             | Miltenyi Biotec | 130-110-457     |
|                        |                                       | $\gamma\delta$ TCR         | APC-Vio770          | Miltenyi Biotec | 130-114-035     |
|                        |                                       | V $\delta$ 1               | FITC                | Miltenyi Biotec | 130-100-532     |
|                        |                                       | V $\delta$ 2               | APC                 | Miltenyi Biotec | 130-095-803     |
|                        |                                       | V $\gamma$ 9               | PC5                 | Beckman Coulter | A63663          |
|                        | CX3CR1                                | PE-Cy7                     | BioLegend           | 341612          |                 |
| Intracellular panel    | Surface                               | CD3                        | BUV395              | BD Biosciences  | 563546          |
|                        |                                       | CD8                        | BV786               | BD Biosciences  | 563823          |
|                        |                                       | $\gamma\delta$ TCR         | PerCp-Vio700        | Miltenyi Biotec | 130-113-514     |
|                        |                                       | V $\delta$ 1               | FITC                | Miltenyi Biotec | 130-100-532     |
|                        |                                       | V $\delta$ 2               | APC                 | Miltenyi Biotec | 130-095-803     |
|                        |                                       | V $\gamma$ 9               | PC5                 | Beckman Coulter | A63663          |
|                        | Intracellular                         | Granzyme A                 | PE-Cy7              | BioLegend       | 507221          |
|                        |                                       | Granzyme B                 | APC-Fire750         | BioLegend       | 372209          |
|                        |                                       | Granzyme K                 | PE                  | BioLegend       | 370512          |
| Perforin               |                                       | BV421                      | BioLegend           | 353307          |                 |
| Proliferation panel    | Surface                               | $\alpha\beta$ TCR          | APC-Vio770          | Miltenyi Biotec | 130-114-062     |
|                        |                                       | $\gamma\delta$ TCR         | PerCp-Vio700        | Miltenyi Biotec | 130-113-514     |
|                        |                                       | V $\delta$ 1               | PE                  | Miltenyi Biotec | 130-100-535     |
|                        |                                       | V $\delta$ 2               | APC                 | Miltenyi Biotec | 130-095-803     |
| Bulk sort panel        | Surface                               | CD3                        | BUV395              | BD Biosciences  | 563546          |
|                        |                                       | $\alpha\beta$ TCR          | Vioblue             | Miltenyi Biotec | 130-110-457     |
|                        |                                       | $\gamma\delta$ TCR         | APC-Vio770          | Miltenyi Biotec | 130-114-035     |
|                        |                                       | V $\delta$ 1               | FITC                | Miltenyi Biotec | 130-100-532     |
|                        |                                       | V $\delta$ 2               | APC                 | Miltenyi Biotec | 130-095-803     |
|                        |                                       | V $\gamma$ 9               | PC5                 | Beckman Coulter | A63663          |
| Single cell sort panel | Surface                               | CD3                        | BUV395              | BD Biosciences  | 563546          |
|                        |                                       | CD27                       | PE-Dazzle594        | BioLegend       | 356422          |
|                        |                                       | $\alpha\beta$ TCR          | Vioblue             | Miltenyi Biotec | 130-110-457     |
|                        |                                       | $\gamma\delta$ TCR         | APC-Vio770          | Miltenyi Biotec | 130-114-035     |
|                        |                                       | V $\delta$ 1               | FITC                | Miltenyi Biotec | 130-100-532     |
|                        | CX3CR1                                | PE-Cy7                     | BioLegend           | 341612          |                 |

*Cat. no., catalogue number;*

**Table S4. Number of cells sorted and reads for TRD and TRG for each sample.**

| Study ID         | Sample         | Subset              | No. cells sorted | Reads     |           |
|------------------|----------------|---------------------|------------------|-----------|-----------|
|                  |                |                     |                  | TRD       | TRG       |
| Australian 001   | NA             | V $\delta$ 2+       | 46 148           | 774 911   | 843 344   |
| Australian 005   | NA             | V $\delta$ 2neg     | 6 900            | 687 651   | 576 303   |
|                  | NA             | V $\delta$ 2+       | 22 000           | 1 009 689 | 687 577   |
| Australian 010   | NA             | V $\delta$ 2neg     | 29 890           | 814 200   | 663 395   |
|                  | NA             | V $\delta$ 2+       | 50 000           | 1 007 881 | 649 601   |
| Australian 011   | NA             | V $\delta$ 2neg     | 8 684            | 595 627   | 429 271   |
| Mali Subject 66  | 0 (M)          | V $\delta$ 2neg     | 6 417            | 93 453    | 460 062   |
|                  |                | V $\delta$ 2+       | 3 527            | 106 823   | 1 818 790 |
|                  | 12 months      | V $\delta$ 2neg     | 3 100            | 272 340   | 280 343   |
|                  |                | V $\delta$ 2+       | 2 200            | 332 651   | 274 631   |
|                  | 18 months      | V $\delta$ 2neg     | 11 600           | 351 799   | 1 725 472 |
|                  |                | V $\delta$ 2+       | 6 500            | 226 372   | 110 770   |
| Mali Subject 269 | 0 (M)          | V $\delta$ 2neg     | 16 000           | 314 569   | 538 039   |
|                  |                | V $\delta$ 2+       | 16 000           | 319 494   | 251 369   |
|                  | 28 months      | V $\delta$ 2neg     | 7 800            | 314 568   | 620 297   |
|                  |                | V $\delta$ 2+       | 7 500            | 273 338   | 361 549   |
| Mali Subject 521 | NA             | V $\delta$ 2neg     | 50 000           | 715 573   | 427 974   |
|                  |                | V $\delta$ 2+       | 33 759           | 618 551   | 426 234   |
| Mali Subject 766 | NA             | V $\delta$ 2neg     | 50 000           | 501 491   | 619 906   |
|                  |                | V $\delta$ 2+       | 5 231            | 589 258   | 384 494   |
| CHMI Subject 2   | CHMI1 + 1d     | V $\delta$ 2neg     | 18 707           | 940 963   | 612 682   |
|                  | CHMI4 + 21d    | V $\delta$ 2neg     | 21 058           | 498 717   | 212 095   |
| CHMI Subject 4   | Baseline       | V $\delta$ 2+       | 6 329            | 721 929   | 523 621   |
|                  |                | V $\delta$ 2neg     | 4 395            | 661 676   | 190 381   |
|                  | CHMI1 + 21d    | V $\delta$ 2neg     | 11 032           | 992 581   | 558 789   |
|                  | CHMI3 + 21d    | V $\delta$ 2+       | 50 581           | 502 524   | 645 173   |
|                  |                | V $\delta$ 2neg     | 11 747           | 1 075 848 | 835 176   |
|                  | CHMI4 + 21d    | V $\delta$ 2+       | 35 000           | 502 524   | 645 173   |
|                  |                | V $\delta$ 2neg     | 20 000           | 877 076   | 429 142   |
|                  | CHMI Subject 9 | CHMI1 + 21d         | V $\delta$ 1+    | 3 774     | 511 711   |
| V $\delta$ 2+    |                |                     | 8 294            | 727 289   | 1 060 102 |
| CHMI3 + 21d      |                | V $\delta$ 1+       | 10 000           | 538 013   | 930 511   |
|                  |                | V $\delta$ 2+       | 34 000           | 646 519   | 1 114 960 |
| CHMI4 + 21d      |                | V $\delta$ 2neg     | 50 000           | 752 397   | 936 806   |
|                  |                | $\gamma\delta$ TCR+ | 22 000           | 252 552   | 397 432   |
| CHMI Subject 10  | Baseline       | V $\delta$ 2neg     | 6 310            | 11 991    | 4 628     |
|                  | CHMI1 + 21d    | V $\delta$ 2neg     | 5 139            | 373 479   | 30 157    |
|                  | CHMI3 + 21d    | V $\delta$ 2neg     | 10 732           | 402 445   | 38 588    |
